# Supplementary material for: Dexamethasone and BCAA Failed to Modulate Muscle Mass and mTOR Signaling in GH-Deficient Rats
Source: PubMed Central journal article supplement (PMC4472719; doi:10.1371/journal.pone.0128805), 2015-06-18
Supplement: pone.0128805.s001.pdf [file pone.0128805.s001.pdf]

SDR soleus muscles

|            | type 1 fiber ( $\mu\text{m}^2$ ) | type 2 fiber ( $\mu\text{m}^2$ ) |
|------------|----------------------------------|----------------------------------|
| control    | 996 $\pm$ 8.7                    | 694 $\pm$ 5.1                    |
| BCAA       | 1008 $\pm$ 8.3                   | 633 $\pm$ 5.2                    |
| Dex        | 1051 $\pm$ 8.5                   | 759 $\pm$ 5.9                    |
| BCAA + Dex | 899 $\pm$ 4.6                    | 752 $\pm$ 6.1                    |

SDR EDL muscles

|            | type 1 fiber ( $\mu\text{m}^2$ ) | type 2 fiber ( $\mu\text{m}^2$ ) |
|------------|----------------------------------|----------------------------------|
| control    | 423 $\pm$ 22.4                   | 661 $\pm$ 4.8                    |
| BCAA       | 374 $\pm$ 18.2                   | 642 $\pm$ 4.7                    |
| Dex        | 476 $\pm$ 16.3                   | 722 $\pm$ 4.8                    |
| BCAA + Dex | 444 $\pm$ 23.0                   | 577 $\pm$ 3.7                    |

GH-treated SDR soleus muscles

|            | type 1 fiber ( $\mu\text{m}^2$ ) | type 2 fiber ( $\mu\text{m}^2$ ) |
|------------|----------------------------------|----------------------------------|
| control    | 1569 $\pm$ 16.6                  | 1067 $\pm$ 10.6                  |
| BCAA       | 1558 $\pm$ 11.8                  | 1015 $\pm$ 8.0                   |
| Dex        | 1284 $\pm$ 10.5                  | 775 $\pm$ 5.9                    |
| BCAA + Dex | 1376 $\pm$ 14.6                  | 946 $\pm$ 9.8                    |

GH-treated SDR EDL muscles

|            | type 1 fiber ( $\mu\text{m}^2$ ) | type 2 fiber ( $\mu\text{m}^2$ ) |
|------------|----------------------------------|----------------------------------|
| control    | 622 $\pm$ 31.2                   | 834 $\pm$ 8.3                    |
| BCAA       | 605 $\pm$ 26.6                   | 837 $\pm$ 8.7                    |
| Dex        | 383 $\pm$ 31.3                   | 592 $\pm$ 8.6                    |
| BCAA + Dex | 604 $\pm$ 15.0                   | 726 $\pm$ 6.4                    |
